# Supplementary material
Source: PubMed Central journal article supplement (PMC3396481)
Supplement: 1206999109_pnas.201206999SI.pdf [file 1206999109_pnas.201206999SI.pdf]

# Supporting Information

Deleault et al. 10.1073/pnas.1206999109

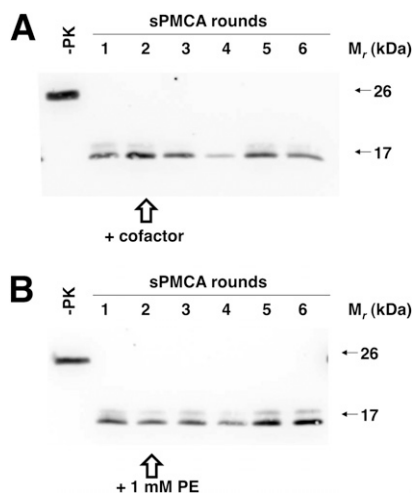

**Fig. S1.** Effect of cofactor molecules on the propagation of protein-only  $\text{PrP}^{\text{Sc}}$  molecules. Western blots of reconstituted serial protein misfolding cyclic amplification (sPMCA) reactions. -PK, samples not subjected to proteinase K digestion; all other samples were proteolyzed. All reactions initially were seeded with OSU (recombinant prion strain originally generated de novo as previously described in ref. 1) protein-only  $\text{PrP}^{\text{Sc}}$  (misfolded prion protein) molecules and subsequently were propagated in substrate mixtures without added cofactor in the first round and subsequently with added purified cofactor preparation (A) or 1 mM plasmalogen phosphatidylethanolamine (PE) (B) in rounds 2–6.

1. Wang F, Wang X, Yuan CG, Ma J (2010) Generating a prion with bacterially expressed recombinant prion protein. *Science* 327:1132–1135.

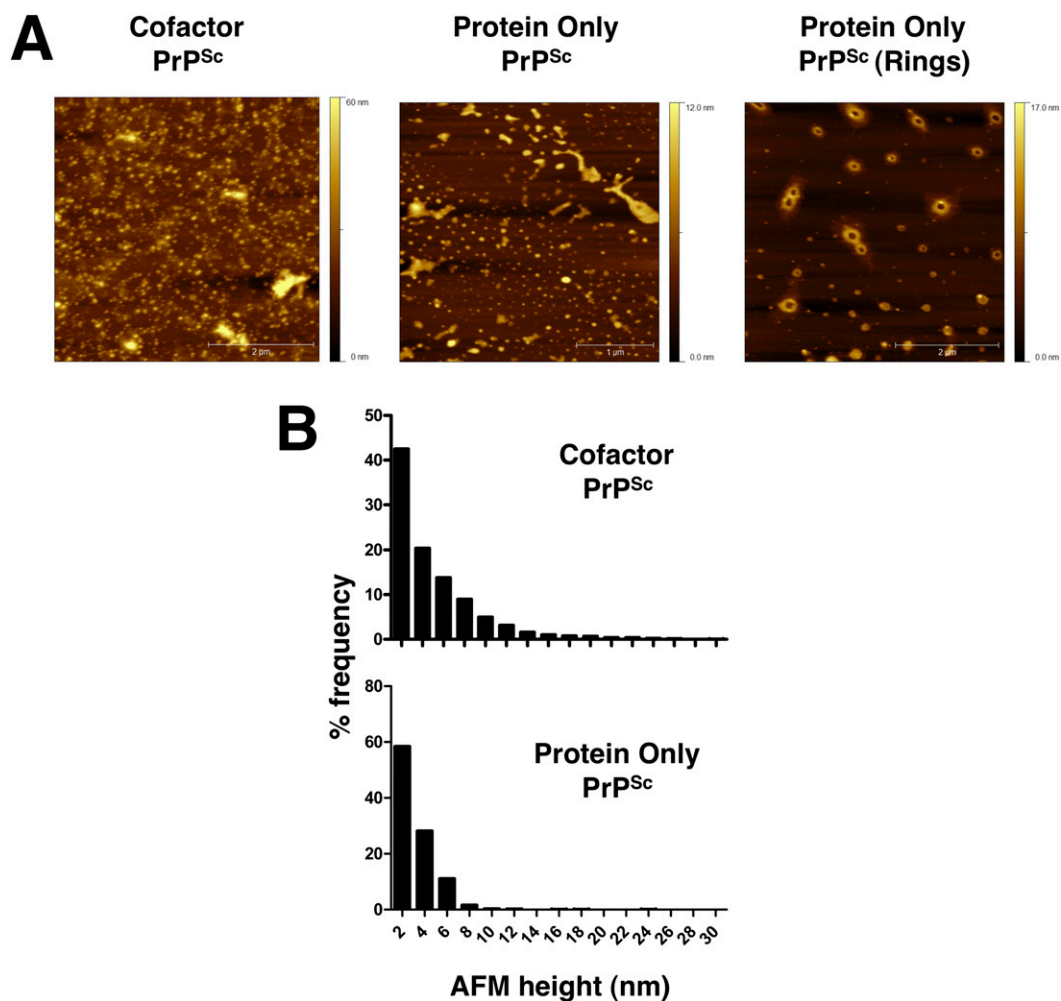

**Fig. S2.** Atomic force microscopy. (A) Representative 2D atomic force microscopy amplitude images of OSU cofactor PrP<sup>Sc</sup> (Left) and OSU protein-only PrP<sup>Sc</sup> (Center and Right) samples. The right panel contains ring forms occasionally observed in the protein-only PrP<sup>Sc</sup> sample. (B) Graphs showing the frequency distribution of heights from cofactor PrP<sup>Sc</sup> (Upper) or protein-only PrP<sup>Sc</sup> (Lower) samples. The data were collected by analyzing atomic force microscopy images collected in tapping mode. More than 1,000 individual particles from each group were analyzed.

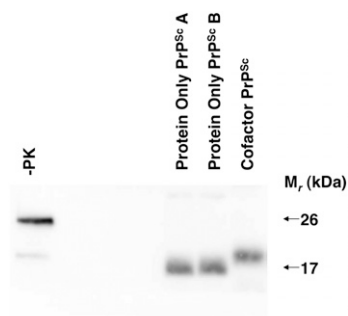

**Fig. S3.** Comparison of inocula. Western blots showing the final product of 18-round sPMCA reactions containing either OSU cofactor PrP<sup>Sc</sup> or OSU protein-only PrP<sup>Sc</sup> molecules. –PK, samples not subjected to proteinase K digestion; all other samples were proteolyzed.



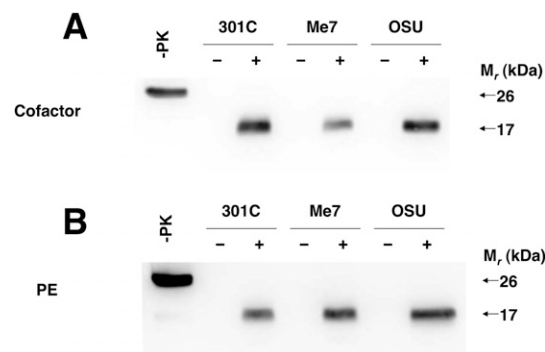

**Fig. S7.** Comparison sPMCA-generated PrP<sup>Sc</sup> inocula. Western blots showing the final product of 18-round sPMCA reactions containing either (A) cofactor PrP<sup>Sc</sup> or (B) PE PrP<sup>Sc</sup> molecules that originally were seeded with prion strains 301C, Me7, or OSU as indicated. -PK, samples not subjected to proteinase K digestion; all other samples were proteolyzed.

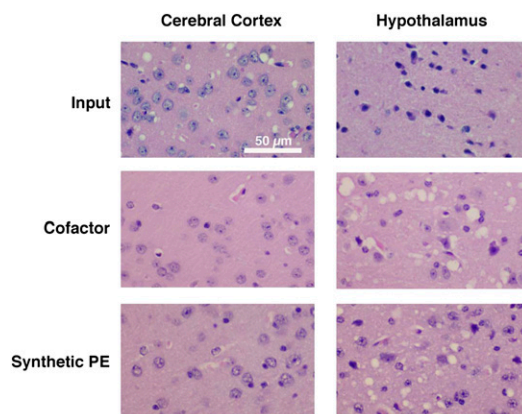

**Fig. S8.** Selective patterns of vacuolation in infected mice. H&E-stained brain sections taken from mice inoculated with OSU input, OSU cofactor PrP<sup>Sc</sup>, and OSU PE PrP<sup>Sc</sup> molecules, as indicated.

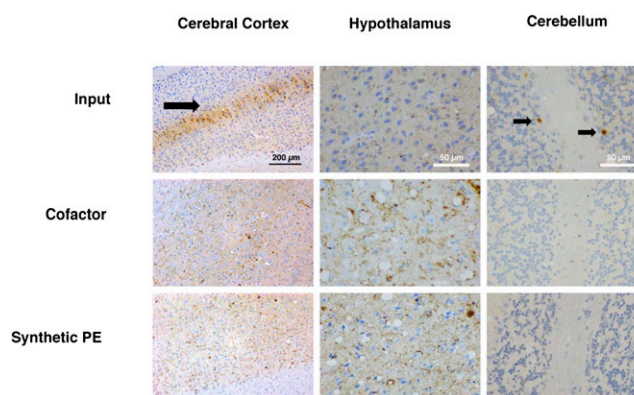

**Fig. S9.** Selective PrP deposition in infected mice. Anti-PrP-immunostained brain sections taken from mice inoculated with 301C input, 301C cofactor PrP<sup>Sc</sup>, or 301C PE PrP<sup>Sc</sup> molecules, as indicated. Arrowheads indicate cortical layers III-IV within the cerebral cortex and discrete PrP deposits within the cerebellum.

**Fig. S10.** Glycoform distribution and electrophoretic mobility of PrP<sup>Sc</sup> molecules in the brains of infected mice. (A) Western blots of brain homogenate samples prepared from animals inoculated with samples containing input prions, cofactor PrP<sup>Sc</sup> molecules, and serial (second)-passage (of cofactor PrP<sup>Sc</sup> molecules) prions derived from different prion strains, as indicated. All samples were subjected to limited proteolysis. (B) Samples also were deglycosylated by treatment with peptide:N-glycosidase F (PNGase F), as indicated (+), before SDS/PAGE.
